# Supplementary material for: Mechanism of interaction between virus and host is inferred from the changes of gene expression in macrophages infected with African swine fever virus CN/GS/2018 strain
Source: Springer Nature journal article supplement (doi:10.1186/s12985-021-01637-6), 2021-08-19

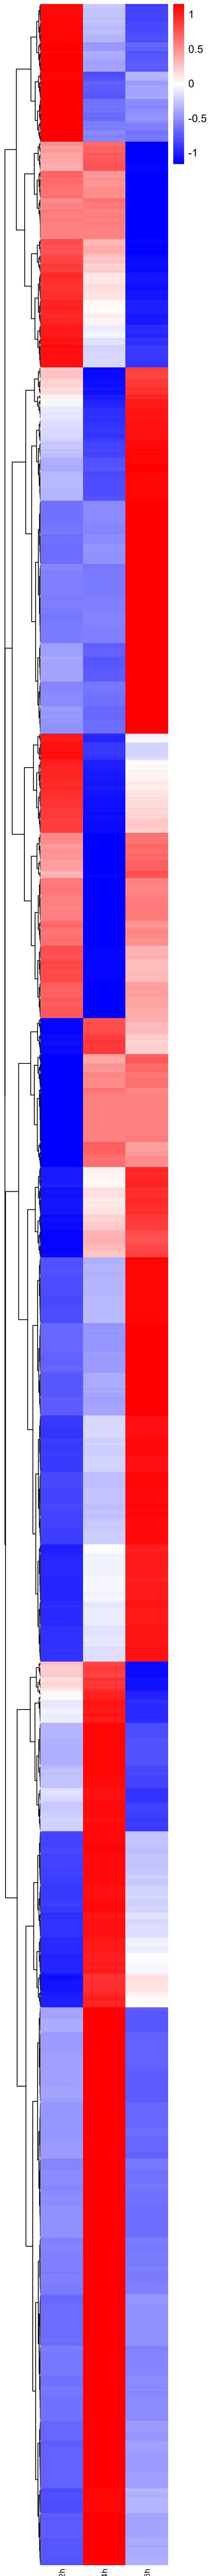

Supplement: MOESM1 [file 19583382]
